# Supplementary material for: Excellent electrochemical performance of tin monosulphide (SnS) as a sodium-ion battery anode
Source: Royal Society of Chemistry journal article supplement (doi:10.1039/c4ra05851h), 2014-01-01
Supplement: c4ra05851h1.pdf [file c4ra05851h1.pdf]

## **Supporting Information**

### Excellent Electrochemical Performance of Tin Monosulphide (SnS) as Sodium-ion Battery Anode

Prasit Kumar Dutta, Uttam Kumar Sen and Sagar Mitra\*

Electrochemical Energy Laboratory, Department of Energy Science and Engineering

Indian Institute of Technology Bombay, Powai, Mumbai-400076, India

EDAX analysis was done on the as prepared SnS material. It was found that the atomic ratio of Sn and S in the as prepared material is around 1:1.

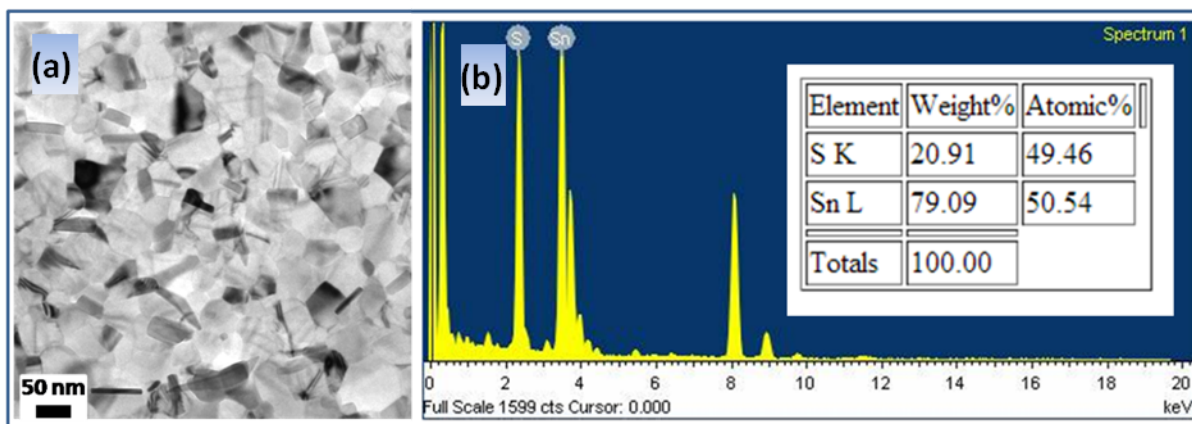

**Fig S1:** (a) TEM image and (b) its corresponding EDAX spectra

An electrode with 70% active material, 20% carbon and 10% binder (by wt) was prepared and its electrochemical performance was compared with the electrode having 60:20:20 composition. The comparison is shown in Fig S2.

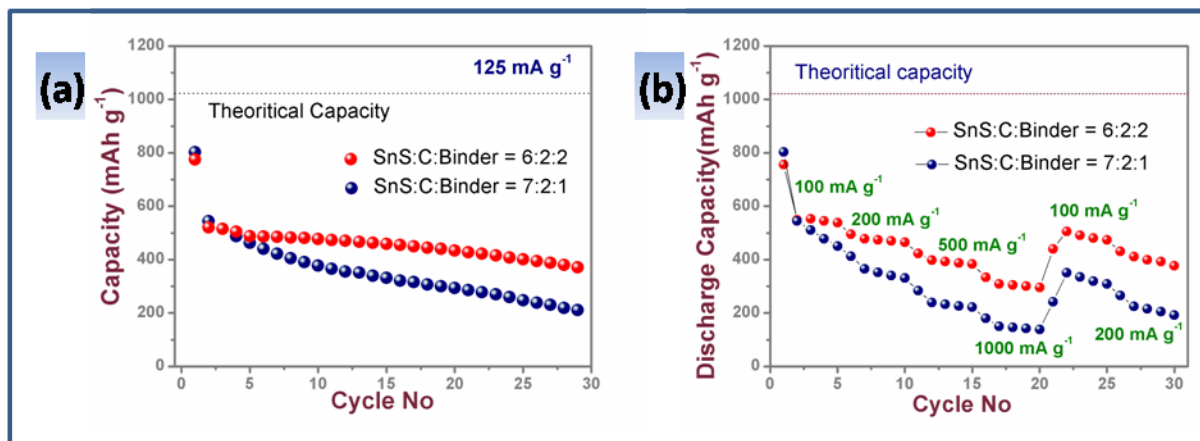

**Fig S2:** (a) Cycling performance and (b) rate performance of electrode material at different electrode composition

From the FEG-SEM images (Fig S3) it has been found that some plate kind of morphology was observed after 30 cycles of charge-discharge reactions which means that the morphology of the active material was changed during conversion and alloying reactions.

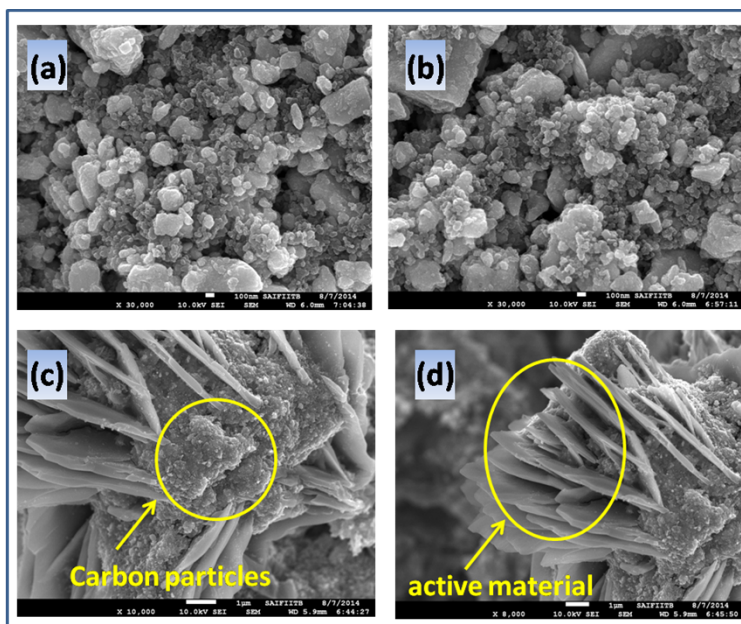

**Fig S3:** FEG-SEM images of the SnS electrode film (a,b) before cycling and (c,d) after 30 cycles at a current rate of 125 mA g<sup>-1</sup>

Further morphological analysis has been done using FEG-TEM analysis. Due to well dispersion the particle distribution was clearly shown in the TEM images (Fig S4). The nano-rods of SnS particles were not visible after 30 cycles of charge-discharge reactions as after 1<sup>st</sup> cycle there is no existence of SnS particles as it forms nanoparticles of Sn and polysulfur after 1<sup>st</sup> cycle.

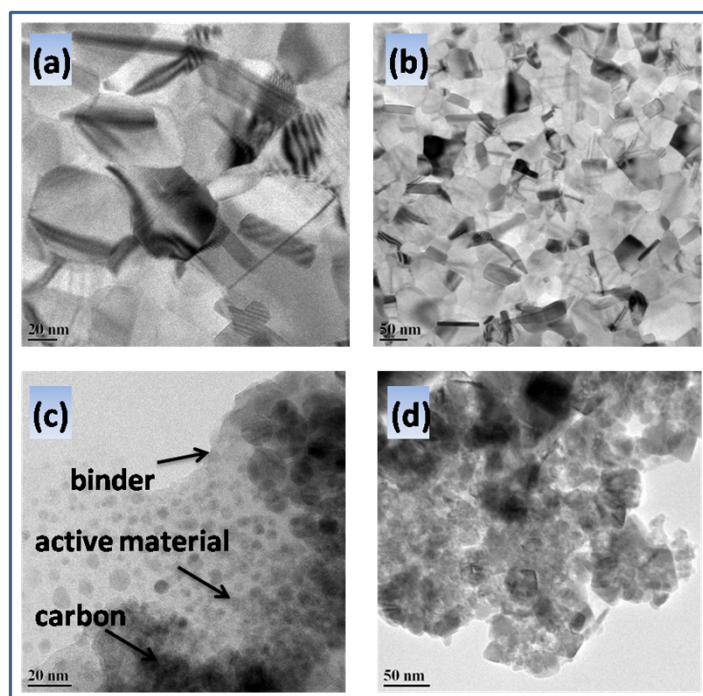

**Fig S4:** FEG-TEM images of the SnS electrode film (a,b) before cycling and (c,d) after 30 cycles at a current rate of 125 mA g<sup>-1</sup>

**Table T1:** Fitted parameters for equivalent circuits for PEIS shown in fig 3.

|           | Voltages<br>(V) | R <sub>1</sub><br>(Ohm) | R <sub>2</sub><br>(Ohm) | R <sub>3</sub><br>(Ohm) |
|-----------|-----------------|-------------------------|-------------------------|-------------------------|
| Discharge | OCV             | 6.891                   | 107.8                   | -                       |
|           | 0.8             | 9.47                    | 153.6                   | -                       |
|           | 0.5             | 10.29                   | 195.7                   | -                       |
|           | 0.3             | 10.55                   | 200.4                   | -                       |
|           | 0.1             | 11.23                   | 210                     | -                       |
| Charge    | 0.5             | 10.37                   | 216                     | -                       |
|           | 0.8             | 11.29                   | 219.8                   | -                       |
|           | 1.2             | 10.7                    | 253.9                   | -                       |
|           | 1.5             | 9.818                   | 149.4                   | 156.6                   |
|           | 2.0             | 10.03                   | 159                     | -                       |
